# Supplementary material
Source: PubMed Central journal article supplement (PMC4209308)
Supplement: NIHMS590252-supplement-01.pdf [file NIHMS590252-supplement-01.pdf]

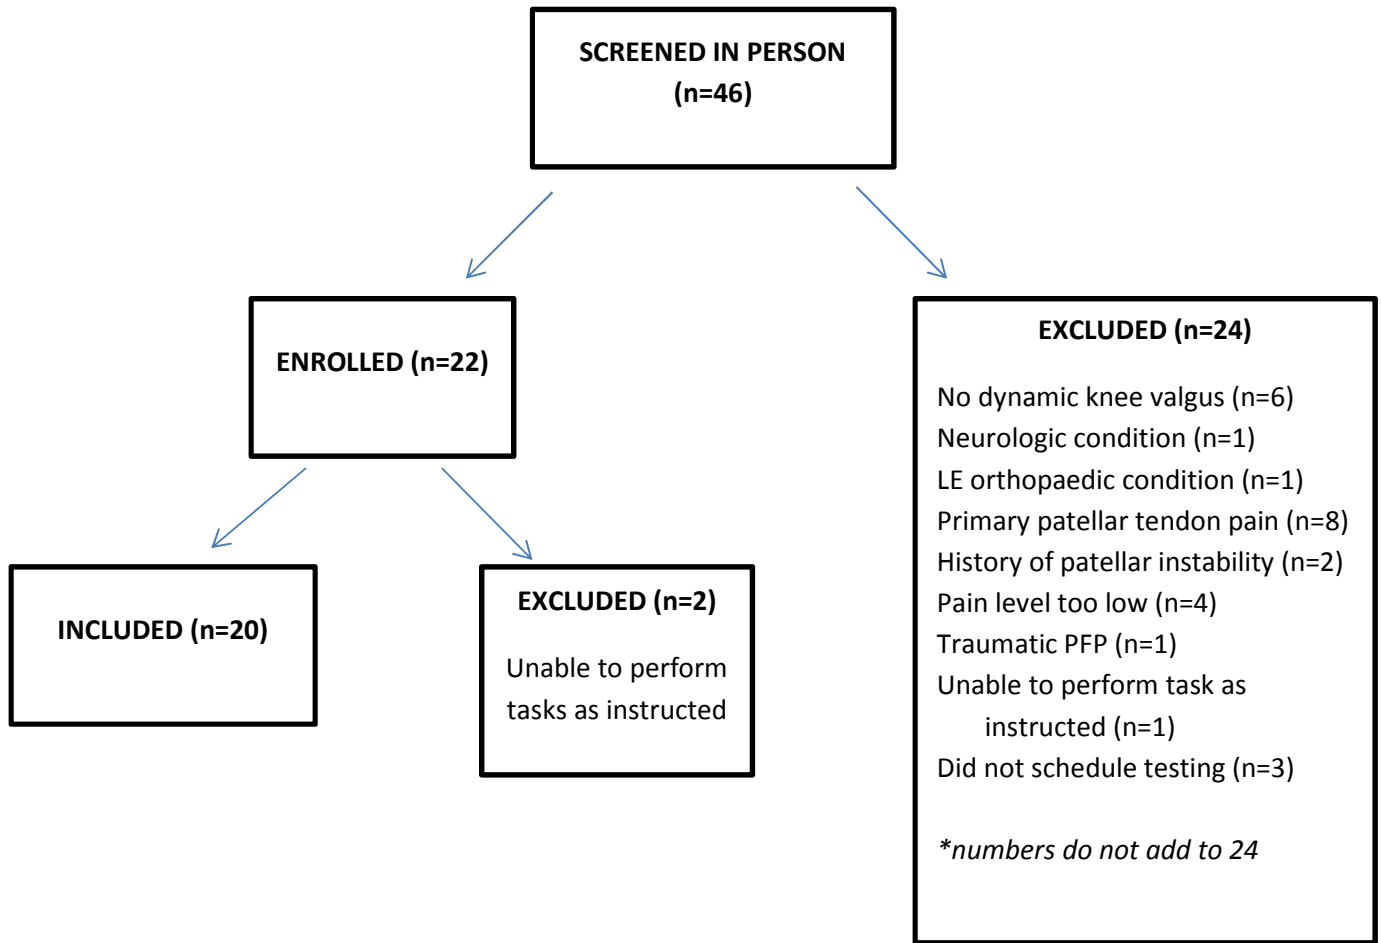

**Supplementary material.** Enrollment flow chart for female PFP subjects. Four of the 24 subjects excluded after screening had multiple reasons for exclusion.
